# Supplementary material
Source: PubMed Central journal article supplement (PMC5992862)
Supplement: blood823757-suppl1.pdf [file blood823757-suppl1.pdf]

## Supplemental Data

### First-in-human Phase 1 Clinical Study of the IL-15 Superagonist Complex ALT-803 to Treat Relapse after Transplantation

Rizwan Romee,<sup>1\*</sup> Sarah Cooley,<sup>2\*</sup> Melissa M. Berrien-Elliott,<sup>1</sup> Peter Westervelt,<sup>1</sup> Michael R. Verneris,<sup>2</sup> John E. Wagner,<sup>2</sup> Daniel J. Weisdorf,<sup>2</sup> Bruce R. Blazar,<sup>2</sup> Celalettin Ustun,<sup>2</sup> Todd E. DeFor,<sup>2</sup> Sithara Vivek,<sup>3</sup> Lindsey Peck,<sup>1</sup> John F. DiPersio,<sup>1</sup> Amanda F. Cashen,<sup>1</sup> Rachel Kylo,<sup>4</sup> Amy Musiek,<sup>4,5</sup> András Schaffer,<sup>4</sup> Milan J. Anadkat,<sup>4,5</sup> Ilana Rosman,<sup>4</sup> Daniel Miller,<sup>6</sup> Jack O. Egan,<sup>7</sup> Emily K. Jeng,<sup>7</sup> Amy Rock,<sup>7</sup> Hing C. Wong,<sup>7</sup> Todd A. Fehniger,<sup>1\*\*</sup> Jeffrey S. Miller<sup>2\*\*</sup>

<sup>1</sup>Division of Oncology, Department of Medicine, Washington University School of Medicine, St. Louis, MO, USA

<sup>2</sup>Blood and Marrow Transplant Program, University of Minnesota, Minneapolis, MN, USA

<sup>3</sup>Masonic Cancer Center, University of Minnesota, Minneapolis, MN, USA

<sup>4</sup>Division of Dermatology, Department of Medicine, Washington University School of Medicine, St. Louis, MO, USA

<sup>5</sup>Department of Pathology and Immunology, Washington University School of Medicine, St. Louis, MO, USA

<sup>6</sup>Department of Dermatology, University of Minnesota, Minneapolis, MN, USA

<sup>7</sup>Altor BioScience LLC, Miramar, FL, USA

**Table S1.** Monoclonal antibodies used in flow cytometry assays.

**Table S2.** Monoclonal antibodies used in mass cytometry assays.

**Table S3.** PK analyses following ALT-803 administration.

**Table S4.** Immunogenicity analysis results from all ALT-803 patients and time points tested.

**Figure S1.** Gating strategy for NK cell subset analyses by mass cytometry.

**Figure S2.** ALT-803 modulation of all stages of NK cell maturation.

**Figure S3.** Gating strategy for CD8 T cell subset analyses by mass cytometry.

**Figure S4.**  $\gamma\delta$ T cell analysis by flow cytometry.

| <b>Target</b> | <b>Conjugate</b>     | <b>Clone</b> | <b>Vendor</b> |
|---------------|----------------------|--------------|---------------|
| CD45          | Horizon V500         | HI30         | BD Horizon    |
| CD3delta      | PE-Texas Red         | 7D6          | Invitrogen    |
| CD56          | Brilliant Violet 605 | HCD56        | Biolegend     |
| CD19          | APC-ef780            | HIB19        | Invitrogen    |
| CD4           | PerCP-Cy5.5          | RPA-T4       | Biolegend     |
| CD8           | Pacific Blue         | 3B5          | Invitrogen    |
| CD25          | APC                  | M-A251       | BD Pharmingen |
| Foxp3         | Alexa Fluor 488      | 259D         | Biolegend     |
| Ki67          | PE                   | B56          | BD Pharmingen |

**Table S1. Monoclonal antibodies used in flow cytometry assays.**

| Marker                           | Clone         | Company           | viSNE clustering |
|----------------------------------|---------------|-------------------|------------------|
| CCR7                             | G043H7        | Biologend         |                  |
| CD117                            | 104D2         | Biologend         | Fig. 5A          |
| CD14                             | M5E2          | BD                | Fig. 5A          |
| CD3                              | UCHT1         | Biologend         | Fig. 5A          |
| CD33                             | WM53          | Biologend         | Fig. 5A          |
| CD34                             | 581           | BD                | Fig. 5A          |
| CD4                              | OKT4          | BD                | Fig. 5A          |
| CD8                              | SK1           | BD                | Fig. 5A          |
| CD94                             | DX22          | Biologend         | Fig. 5B          |
| CRTH2                            | BM16          | Biologend         | Fig. 5A-B        |
| DNAM1                            | DX11          | BD                | Fig. 5B          |
| KIR2DL1/DS1 (CD158a,h)           | EB6B          | Beckman           | Fig. 5B          |
| KIR2DL2/2DL3 (CD158b)            | CH-L          | BD                | Fig. 5B          |
| KIR3DL1                          | DX9           | Biologend         | Fig. 5B          |
| Lag-3                            | 11C3C65       | Biologend         | Fig. 5B          |
| NKG2A                            | Z199          | Beckman           | Fig. 5B          |
| NKG2C                            | 134591        | R&D               | Fig. 5B          |
| NKG2D                            | 1D11          | Novus             | Fig. 5B          |
| NKp30                            | P30-15        | Biologend         | Fig. 5B          |
| NKp44                            | P44-8         | Biologend         | Fig. 5B          |
| NKp46                            | 9E2           | BD                | Fig. 5A-B        |
| PD-1 FitC                        | Keytruda ScFv | Miller Lab        | Fig. 5B          |
| Tim-3                            | F38-2E2       | Biologend         | Fig. 5B          |
| TRAIL                            | RIK-2         | Biologend         | Fig. 5B          |
| anti-FitC                        | FIT-22        | Fluidigm          |                  |
| CD11b                            | ICR44         | Fluidigm          | Fig. 5A-B        |
| CD127                            | A019D5        | Fluidigm          | Fig. 5A          |
| CD137                            | 4B4-1         | Fluidigm          | Fig. 5B          |
| CD16                             | 3G8           | Fluidigm          | Fig. 5A-B        |
| CD19                             | HIB19         | Fluidigm          | Fig. 5A          |
| CD25                             | 2A3           | Fluidigm          | Fig. 5A-B        |
| CD45                             | HI30          | Fluidigm          | Fig. 5A-B        |
| CD45RO                           | UCHL1         | Fluidigm          |                  |
| CD56                             | NCAM16.2      | Fluidigm          | Fig. 5A-B        |
| CD57                             | HCD57         | Fluidigm          | Fig. 5B          |
| CD62L                            | DREG-56       | Fluidigm          | Fig. 5B          |
| GzmB                             | GB11          | Fluidigm          | Fig. 5B          |
| Ki67                             | B56           | Fluidigm          | Fig. 5B          |
| TIGIT                            | MBSA43        | Fluidigm          | Fig. 5B          |
| Cell-ID 20-Plex Pd Barcoding Kit |               | Fluidigm          |                  |
| DNA-IR                           |               | Fluidigm          |                  |
| X8 Metal Conjugation Kits        |               | Fluidigm          |                  |
| Cisplatin                        |               | Enzo Life Science |                  |
| Goat Serum                       |               | Sigma             |                  |

**Table S2. Monoclonal antibodies used in mass cytometry assays.** When possible, directly conjugated antibodies were purchased (Fluidigm). Otherwise, purified antibodies were conjugated using Fluidigm X8 metal conjugation kits, according to manufacturer's instruction.

**Table S3A. Mean (±SD) PK Parameters in Patients After a Single IV Dose of ALT-803**

| Dose (µg/kg) | Stat. Param. | T <sub>1/2</sub> | T <sub>max</sub> <sup>1</sup> | C <sub>max</sub> | AUC <sub>0-t</sub> | AUC <sub>0-∞</sub> | CL         | V <sub>ss</sub> |
|--------------|--------------|------------------|-------------------------------|------------------|--------------------|--------------------|------------|-----------------|
|              |              | (hr)             | (hr)                          | (ng/mL)          | (hr*ng/mL)         | (hr*ng/mL)         | (mL/hr/kg) | (mL/kg)         |
| <b>1</b>     | <b>N</b>     | 3                | 6                             | 6                | 6                  | 3                  | 3          | 3               |
|              | <b>Mean</b>  | 0.749            | 0.658                         | 4.17             | 8.10               | 9.97               | 129        | 85.4            |
|              | <b>SD</b>    | 0.170            | 0.583, 0.800                  | 3.02             | 5.42               | 6.30               | 71.6       | 24.6            |
|              | <b>CV%</b>   | 22.8             | NA                            | 72.5             | 66.9               | 63.2               | 55.5       | 28.8            |
| <b>3</b>     | <b>N</b>     | 3                | 3                             | 3                | 3                  | 3                  | 3          | 3               |
|              | <b>Mean</b>  | 2.72             | 0.767                         | 44.9             | 178                | 178                | 19.3       | 51.7            |
|              | <b>SD</b>    | 1.81             | 0.517, 0.817                  | 10.9             | 73.2               | 73.0               | 9.37       | 3.58            |
|              | <b>CV%</b>   | 66.5             | NA                            | 24.4             | 41.1               | 40.9               | 48.5       | 6.9             |
| <b>6</b>     | <b>N</b>     | 4                | 4                             | 4                | 4                  | 4                  | 4          | 4               |
|              | <b>Mean</b>  | 3.15             | 0.742                         | 88.1             | 384                | 384                | 16.7       | 53.8            |
|              | <b>SD</b>    | 1.14             | 0.633, 2.17                   | 37.7             | 128                | 128                | 4.25       | 21.2            |
|              | <b>CV%</b>   | 36.2             | NA                            | 42.8             | 33.3               | 33.3               | 25.5       | 39.4            |
| <b>10</b>    | <b>N</b>     | 3                | 3                             | 3                | 3                  | 3                  | 3          | 3               |
|              | <b>Mean</b>  | 4.87             | 2.18                          | 190              | 1040               | 1040               | 10.0       | 47.5            |
|              | <b>SD</b>    | 3.46             | 0.667, 4.22                   | 75.5             | 222                | 221                | 2.41       | 12.2            |
|              | <b>CV%</b>   | 71.1             | NA                            | 39.8             | 21.4               | 21.4               | 24.1       | 25.6            |

<sup>1</sup> Median and range (Min, Max) presented; NA: not applicable.

**Table S3B. Mean (±SD) PK Parameters Patients After a Single SQ Dose of ALT-803**

| Dose (µg/kg) | Stat. Param. | T <sub>1/2</sub> | T <sub>max</sub> <sup>1</sup> | C <sub>max</sub> | AUC <sub>0-t</sub> | AUC <sub>0-∞</sub> | V <sub>z</sub> /F | CL/F       | F    |
|--------------|--------------|------------------|-------------------------------|------------------|--------------------|--------------------|-------------------|------------|------|
|              |              | (hr)             | (hr)                          | (ng/mL)          | (hr*ng/mL)         | (hr*ng/mL)         | (mL/kg)           | (mL/hr/kg) | (%)  |
| <b>6</b>     | <b>N</b>     | 1                | 8                             | 8                | 8                  | 1                  | 1                 | 1          | 8    |
|              | <b>Mean</b>  | 22.2             | 35.1                          | 0.389            | 13.7               | 29.7               | 6470              | 202        | 3.56 |
|              | <b>SD</b>    | NR               | 0.500, 55.7                   | 0.317            | 8.10               | NR                 | NR                | NR         | 2.11 |
|              | <b>CV%</b>   | NR               | NA                            | 81.6             | 59.2               | NR                 | NR                | NR         | 59.2 |
| <b>10</b>    | <b>N</b>     | 4                | 9                             | 9                | 9                  | 4                  | 4                 | 4          | 9    |
|              | <b>Mean</b>  | 29.3             | 8.25                          | 0.921            | 30.9               | 44.5               | 10800             | 247        | 2.99 |
|              | <b>SD</b>    | 10.8             | 4.02, 46.1                    | 0.375            | 16.6               | 15.3               | 6090              | 87.6       | 1.60 |
|              | <b>CV%</b>   | 36.9             | NA                            | 40.7             | 53.5               | 34.4               | 56.3              | 35.5       | 53.5 |

<sup>1</sup> Median and range (Min, Max) presented; NR: not reported (N<3); NA: not applicable.

**Table S3. PK analyses following ALT-803 administration.**

| Patient | Dose | Route | Pre-dose | D7 Post<br>Dose2 | D7 Post<br>Dose4 |
|---------|------|-------|----------|------------------|------------------|
| UMN-001 | 1    | IV    | 0        | 0                | 0                |
| UMN-002 | 1    | IV    | 0        | 0                | NC               |
| UMN-003 | 1    | IV    | 0        | 0                | NC               |
| UMN-004 | 1    | IV    | MS       | 0                | NC               |
| UMN-005 | 1    | IV    | MS       | 0                | NC               |
| UMN-006 | 1    | IV    | MS       | 0                | NC               |
| WSU-001 | 3    | IV    | 0        | 0                | 0                |
| UMN-007 | 3    | IV    | 0        | 0                | 0                |
| UMN-008 | 3    | IV    | 0        | 0                | 0                |
| UMN-009 | 6    | IV    | 0        | 0                | 0                |
| UMN-010 | 6    | IV    | 0        | 0                | NC               |
| UMN-011 | 6    | IV    | 0        | 0                | 0                |
| WSU-002 | 6    | IV    | 0        | 0                | 0                |
| UMN-012 | 10   | IV    | 0        | 0                | 0                |
| UMN-013 | 10   | IV    | 0        | 0                | 0                |
| UMN-014 | 10   | IV    | 0        | 0                | 0                |
| UMN-015 | 6    | SQ    | 0        | 0                | NC               |
| WSU-003 | 6    | SQ    | 0        | 0                | 0                |
| WSU-004 | 6    | SQ    | 0        | 0                | 0                |
| UMN-016 | 6    | SQ    | 0        | 0                | 50               |
| WSU-005 | 6    | SQ    | 0        | 0                | 0                |
| WSU-006 | 6    | SQ    |          |                  |                  |
| WSU-007 | 6    | SQ    |          |                  |                  |
| UMN-017 | 6    | SQ    | 0        | 0                | 0                |
| WSU-008 | 10   | SQ    |          |                  |                  |
| WSU-009 | 10   | SQ    |          |                  |                  |
| WSU-010 | 10   | SQ    |          |                  |                  |
| UMN-018 | 10   | SQ    | 0        | 0                | 0                |
| UMN-019 | 10   | SQ    | 0        | 0                | 0                |
| UMN-020 | 10   | SQ    |          |                  |                  |
| UMN-021 | 10   | SQ    |          |                  |                  |

**Table S4. Immunogenicity analysis results from all ALT-803 patients and time points tested.** Immunogenicity results are shown as average titer. NC, not collected. MS, missing sample.

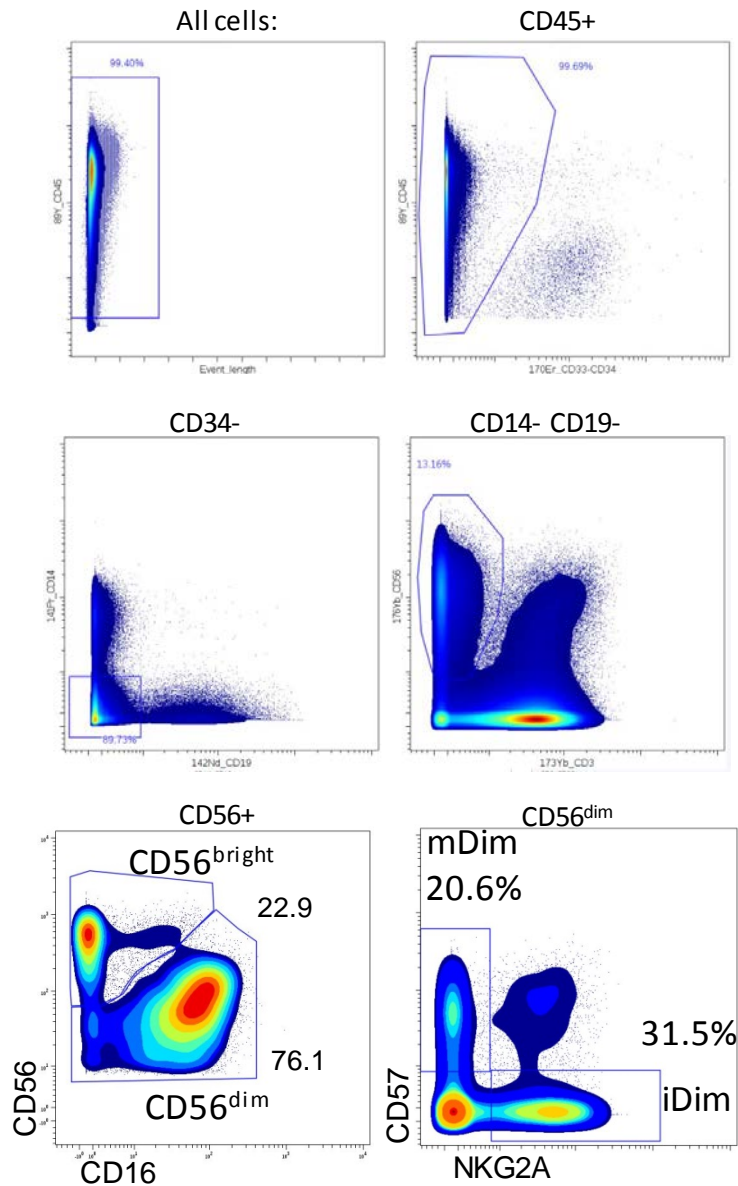

**Figure S1. Gating strategy for NK cell subset analyses by mass cytometry.**

CD56<sup>bright</sup> (CD16<sup>-</sup> CD56<sup>bright</sup>) and CD56<sup>dim</sup> (CD16<sup>+</sup> CD56<sup>+</sup>) NK cells. CD56<sup>dim</sup> NK Cells were then assessed for NKG2A and CD57 expression. Mature Dims (mDim, CD57<sup>+</sup> NKG2A<sup>-</sup>) and immature Dim (iDim; CD57<sup>-</sup> NKG2A<sup>+</sup>) were further examined. CD56<sup>bright</sup> NK cell immunophenotype was confirmed using addition markers (NKG2A, KIR, CD57) to ensure these cells represented CD56<sup>bright</sup>, and not CD56<sup>dim</sup> NK cells with increased density of CD56 after ALT-803 administration.

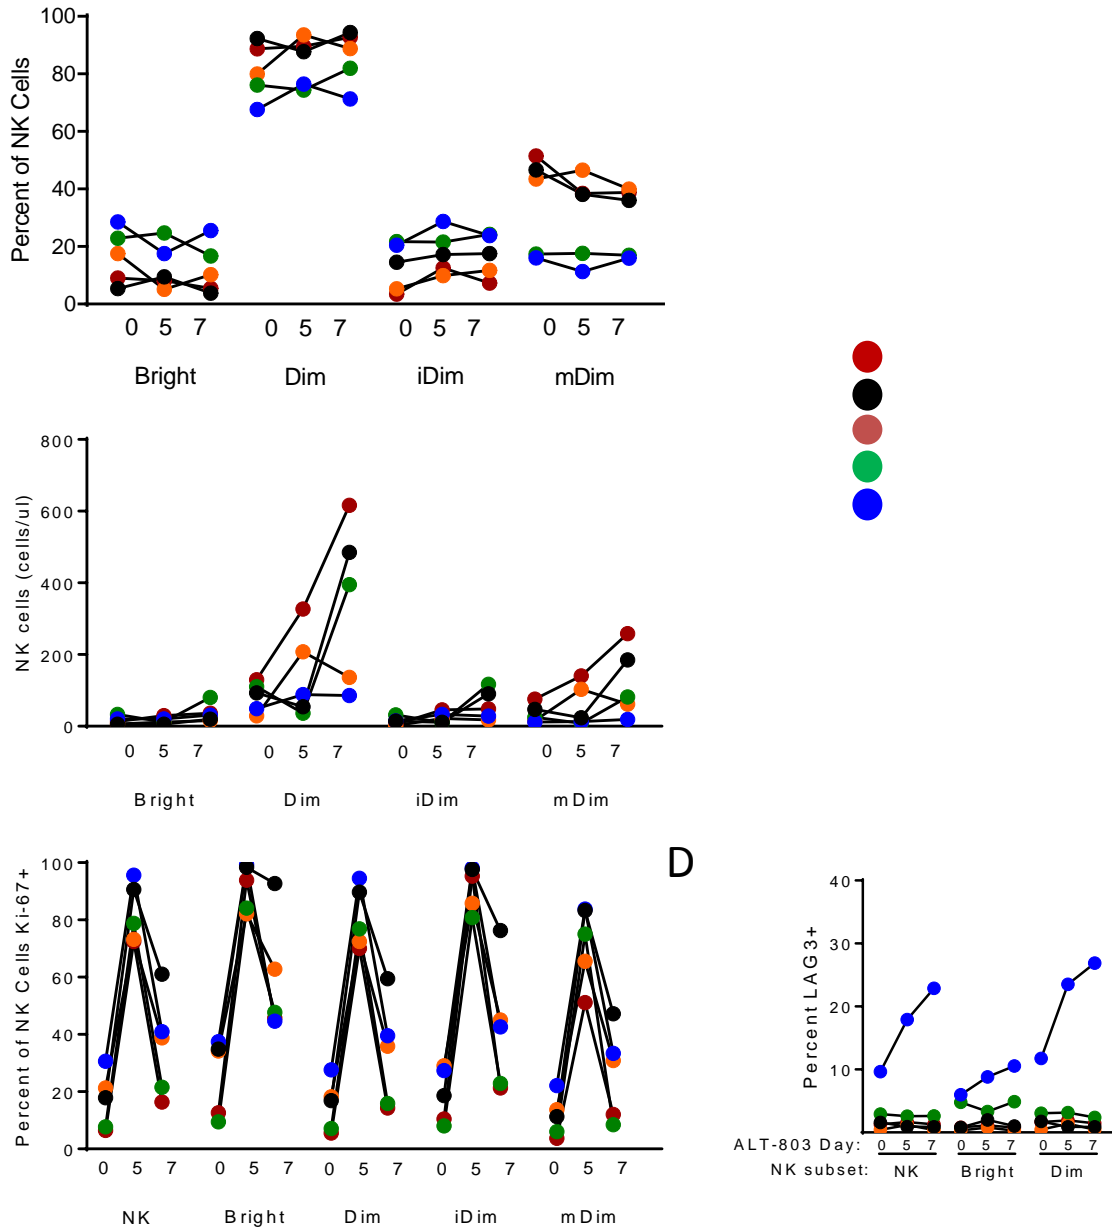

**Figure S2. ALT-803 induced all stages of NK cell maturation, detected by mass cytometry.** (A) Percentage of identified subset within NK cells. Bright, CD56<sup>bright</sup>; Dim, CD56<sup>dim</sup>; iDim, immature CD56<sup>dim</sup>; mDim, mature CD56<sup>dim</sup>. Gating on subsets was performed as shown figure S1. (B) Number of NK cells within the peripheral blood of each NK cell subset. (C) Percentage Ki67 positive within the peripheral blood of each NK cell subset. (D) Modulation of LAG-3 following ALT-803 administration is patient specific, with 1 of 5 patients tested with induced expression.

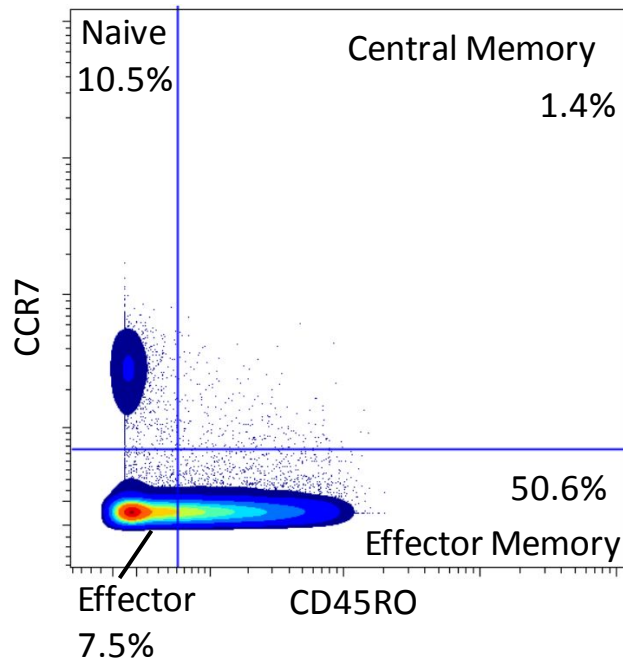

**Figure S3. Gating strategy for CD8 T cell subset analyses by mass cytometry.** CD8<sup>+</sup> T cell gating strategy. CD8<sup>+</sup> T cells were gated into Naïve (CCR7<sup>+</sup> CD45RO<sup>-</sup>), Effector (CCR7<sup>-</sup> CD45RO<sup>-</sup>), Central memory (CCR7<sup>+</sup> CD45RO<sup>+</sup>), and Effector memory (CCR7<sup>-</sup> CD45RO<sup>+</sup>).



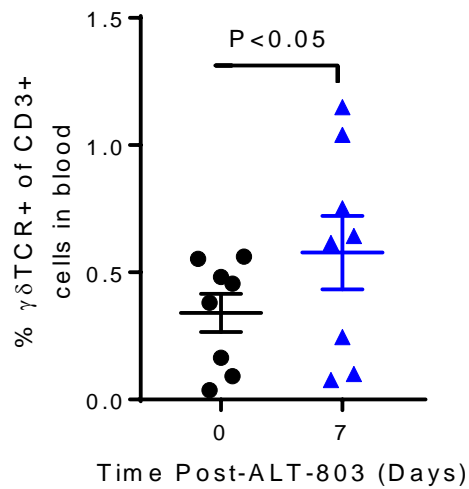

**Figure S4. Analysis of  $\gamma\delta$ T cells in blood of SQ ALT-803 patients.** (A)  $\gamma\delta$ T cells were identified in PBMC by gating on live CD3+ lymphocytes that were CD4-CD8-, as previously published (Wistuba-Hamprecht et. al, Cytometry Part A, 85A:522-524, 2014). The frequency of  $\gamma\delta$ TCR+ T cells within CD3+ lymphocytes was a small in the blood and increased modestly yet significantly following ALT-803 administration (N=8, including patients with skin biopsies included in Figure 1). The average fold change from pre-therapy (0) to day 7 was 1.68-fold increase in frequency.
